# Supplementary material for: The Combined Strategy for iron uptake is not exclusive to domesticated rice (Oryza sativa)
Source: PubMed Central journal article supplement (PMC6834603; doi:10.1038/s41598-019-52502-0), 2019-11-06

## **The Combined Strategy for iron uptake is not exclusive to domesticated rice (*Oryza sativa*)**

Andriele Wairich<sup>1</sup>, Ben Hur Neves de Oliveira<sup>1</sup>, Ezequiel Barth Arend<sup>2</sup>, Guilherme Leitão Duarte<sup>1</sup>, Lucas Roani Ponte<sup>3</sup>, Raul Antonio Sperotto<sup>4</sup>, Felipe Klein Ricachenevsky<sup>\*1,3</sup>, Janette Palma Fett<sup>\*1</sup>

Supplementary Material

### **Supplementary Table Legends**

**Supplementary Table 1.** Full transcriptome data sets revealed by RNAseq in roots of *Oryza sativa* after five days under Fe-deficiency.

**Supplementary Table 2.** Full transcriptome data sets revealed by RNAseq in roots of *Oryza rufipogon* after five days under Fe-deficiency.

**Supplementary Table 3.** Gene-specific PCR primers used for RT-qPCR and PCR efficiencies.

**Supplementary Table 3.** Gene-specific PCR primers used for RT-qPCR.

| Locus                                          | Gene name                                | Forward Primer 5' → 3'   | Reverse Primer 5' → 3'  | PCR amplification efficiencies                   |                                                     |
|------------------------------------------------|------------------------------------------|--------------------------|-------------------------|--------------------------------------------------|-----------------------------------------------------|
| <i>Oryza sativa/ O. rufipogon</i> <sup>A</sup> |                                          |                          |                         | Eff target gene / endogenous<br><i>O. sativa</i> | Eff target gene /<br>endogenous <i>O. rufipogon</i> |
| OS01G0952800/ORUF101G47560                     | <i>IRO2</i>                              | CGGATTTGGGAACAGGACA      | GTCCTGACGACTTCTCCA      | 1.939027/1.886871                                | 1.931052/1.86818                                    |
| OS03G0667500/ORUF103G29910                     | <i>IRT1</i>                              | ACTGGTGCCCATCTGC         | GCGAGGATGGGGATGG        | 1.877963/1.882419                                | 1.912471/1.936508                                   |
| OS01G0605100/ORUF101G24790                     | <i>BCS1</i>                              | CTGGAActCAACCCTTCGA      | CCTCTGAAGGATTGGATTGG    | 1.917836/1.889704                                | 1.937038/1.906191                                   |
| OS10G0370500                                   | Cellulase                                | CACCCTGAGGTCGAACG        | GGCGAACCGGACGAG         | 1.838172/1.862471                                | 1.848612/1.860437                                   |
| OS01G0323600/ORUF101G14960                     | S-<br>adenosylmethionine<br>synthetase 2 | ACGCCACCTTGCTGTC         | GACGTTCTCTTCACCTCC      | 1.888845/1.936181                                | 1.886621/1.891841                                   |
| OS07G0258400/ORUF107G09420                     | <i>NRAMP1</i>                            | CATGCTGCTCTACGTCGTC      | CAGCTCACGACGAGACAC      | 1.946169/1.886966                                | 1.957729/1.953282                                   |
| OS03G0751100/ORUF103G35800                     | <i>OPT7</i>                              | AGTGTGAAGGCGCCG          | ATCTTCTTCTTCGCGAGCTT    | 1.796674/1.825561                                | 1.799743/1.816699                                   |
| OS11G0134900                                   | <i>ZIFL4-TOM1</i>                        | TGTGATTGAATTAATTGGACTTGC | GGGGTGCTATTCCAGCTTCT    | 1.935136/1.866774                                | 1.93262/1.956244                                    |
| OS03G0237100/ORUF103G09980                     | <i>DMAS</i>                              | CCTGGACATCGTCGGAT        | GTCGTCGAGCGACTTGTAG     | 1.883525/1.911072                                | 1.892687/1.898705                                   |
| OS09G0133200                                   | Reductase SDR<br>Family                  | GAGCTTATTGACAGGAGCACA    | AGCAACAACAATAGTTTCAGCTG | 1.944826/1.909023                                | 1.899864/1.93218                                    |
| OS02G0650300/ ORUF102G27480                    | <i>YSL15</i>                             | GGTGCGGGGATGATTG         | CCATACAAACTTGTCATGCTG   | 1.949223/1.902821                                | 1.925499/1.871946                                   |
| OS12G0133100                                   | <i>ZIFL12</i>                            | CCCAAActGTTGAAGCTTTGG    | GGACATCAAGGGCCAATTC     | 1.894337/1.888208                                | 1.884827/1.885545                                   |
| OS01G0328400                                   | <i>UBQ5</i>                              | ACCACTTCGACCGCCACTACT    | ACGCCTAAGCCTGCTGGTT     | -                                                | -                                                   |
| <i>Zea mays</i>                                |                                          |                          |                         | Eff target gene                                  | Eff endogenous gene                                 |
| Zm00001d033446                                 | <i>IRT1</i>                              | GCTTCTACAACCGGAGGAAG     | GTCCTCGGGCTTGTCAG       | 1.940012                                         | 1.909559                                            |
| Zm00001d017429                                 | <i>YS1</i>                               | GTCTGGGAGAAGGTGAACAG     | GGCCAGAGCGAGAATGG       | 1.894495                                         | 1.892154                                            |
| Zm00001d028360                                 | <i>DMAS</i>                              | GAGCTTCGACGAGGGG         | GTGCTCGGAGACGTAGC       | 1.920767                                         | 1.879584                                            |
| Zm00001d041111                                 | <i>TOM1</i>                              | CTTTCCTTGTGGACCGTAAGT    | ACAAATGAACATACCTGCAATCG | 1.917432                                         | 1.861516                                            |

|                |               |                       |                          |          |          |
|----------------|---------------|-----------------------|--------------------------|----------|----------|
| Zm00001d052434 | <i>TOM2</i>   | GACCCTACACAAGCACAGA   | GGAGGGAGAAGACGCAGTA      | 1.865249 | 1.861516 |
| Zm00001d005001 | <i>TOM3</i>   | GCCCACCAGAGTGACTAC    | CTGAATAAGCCATATCATGGAAGG | 1.897926 | 1.861516 |
| Zm00001d042062 | <i>IRO2</i>   | GCCTCAACGACACGGAG     | CCCAAAGGTGGAGTAGGTT      | 1.843356 | 1.892154 |
| Zm00001d029339 | <i>IRO3</i>   | CTTTCCAGAAGTGGCATCTG  | GCTTGTGCTGCTACTGC        | 1.866295 | 1.905458 |
| Zm00001d053834 | <i>UBQ</i>    | CGGCAAGCAGCTGGAG      | GCGCAGCACCAGGTG          | -        | -        |
| Zm00001d025205 | <i>FIT</i>    | CCGAACGGCGGGTTATT     | CACTGCTGGTAGTGGTCG       | 1.846875 | 1.879584 |
| Zm00001d002006 | <i>MHA2</i>   | GTTCCCTGGGTTTCATGTGGA | GGAGTTGATAACCAAGAGCACG   | 1.865067 | 1.905458 |
| Zm00001d005479 | <i>NRAMP1</i> | CTCATTGGCATTGTCGTGTT  | CACGAACTTGATGGTCTCC      | 1.862461 | 1.768098 |

***Sorghum bicolor***

|                   |               |                       |                        | <i>Eff target gene</i> | <i>Eff endogenous gene</i> |
|-------------------|---------------|-----------------------|------------------------|------------------------|----------------------------|
| SORBI_001G142900  | <i>IRT1</i>   | GACCGCAACCTCTTCGT     | GGTGGTGAAGGAGAAATCGG   | 1.958446               | 1.958171                   |
| SORBI_003G428800  | <i>IRO2</i>   | CGGAGATCATGGTTCAGGT   | CTTGTTCTCGAAGGTGGAGT   | 1.948199               | 1.913552                   |
| SORBI_002G095600  | <i>NRAMP1</i> | GCATCATCGTGTCCCTCTTAT | CATCGGCAACCTTTGATTTGTC | 1.924862               | 1.914071                   |
| SORBI_004G299500  | <i>YS1</i>    | GAAGTACGCGAGGTTTGTG   | CAGCCTCCTTCTTGTTTCATC  | 1.913064               | 1.924862                   |
| SORBI_3001G112600 | <i>ACT1</i>   | GGCAACATCGTCCTCTCT    | CCTCCAATCCAGACACTGT    | -                      | -                          |

---

Genes for which *O. rufipogon* loci is not shown were identified as differentially expressed by RNAseq only in *O. sativa*.

<sup>A</sup> *IRT1*, *NRAMP1*, *IRO2*, and *YSL15* primers are the same used for all species.

**Supplementary Figure 1.** Transcriptomic analysis of *Oryza sativa* and *Oryza rufipogon* roots from plants grown in control (CC) and Fe deficiency (-Fe) conditions for five days. Differential gene expression analysis of RNAseq from CC versus -Fe for (A) *O. sativa* and (B) *O. rufipogon*. Genes identified as differentially expressed by Kallisto (FDR < 0.05) are represented by red (up-regulated) and blue (down-regulated) lines. The y-axis represents a dendrogram from hierarchical clustering presented as transcripts per million reads (TPM). CC1: library 1 in control condition; CC2: library 2 in control condition; -Fe1: library 1 in iron deficiency condition; -Fe2: library 2 in iron deficiency condition.

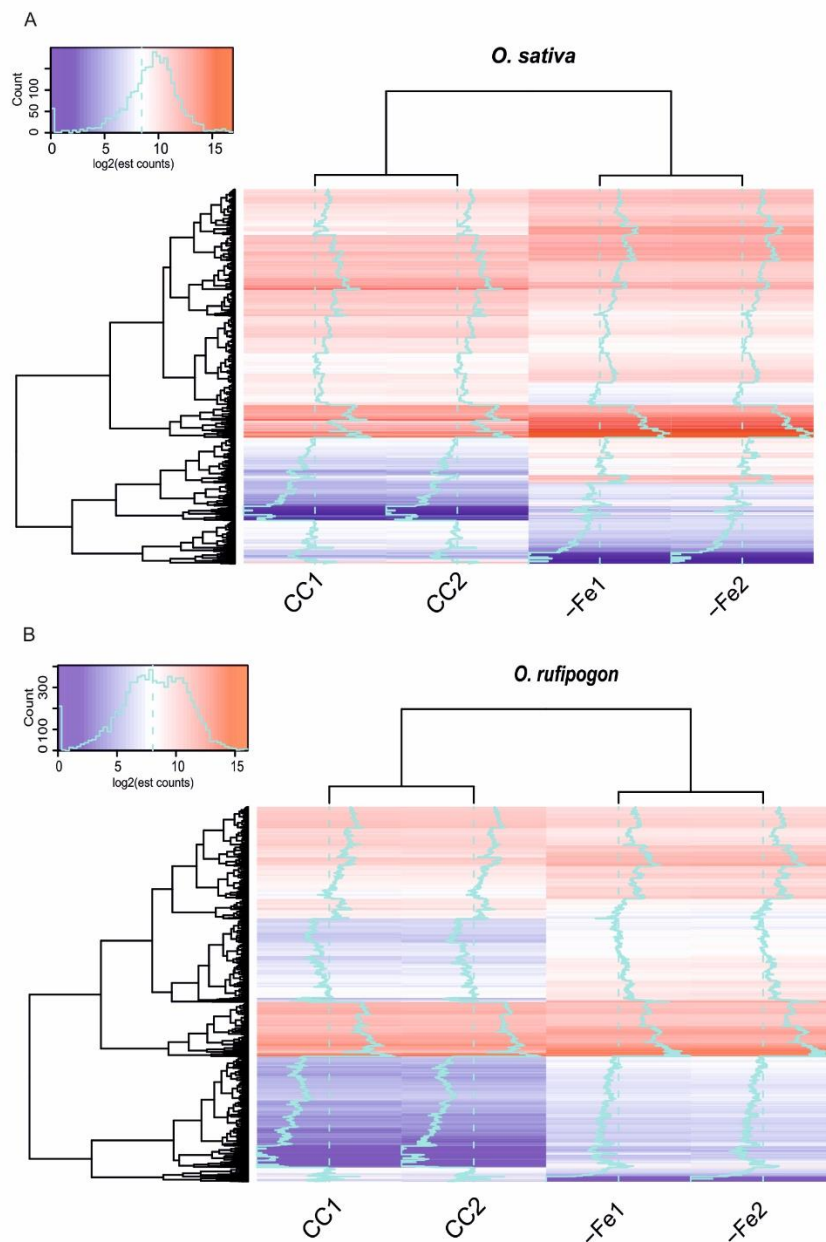

**Supplementary Figure 2.** Shared Gene Ontology (GO) terms in the response to Fe deficiency between cultivated (*Oryza sativa*) and wild (*Oryza rufipogon*) rice. The figure presents the terms regulated in common and with high level of significance for both species. (A) Up-regulated processes. (B) Down-regulated processes. Blue columns refer to *O. sativa*. Orange columns refer to *O. rufipogon*.

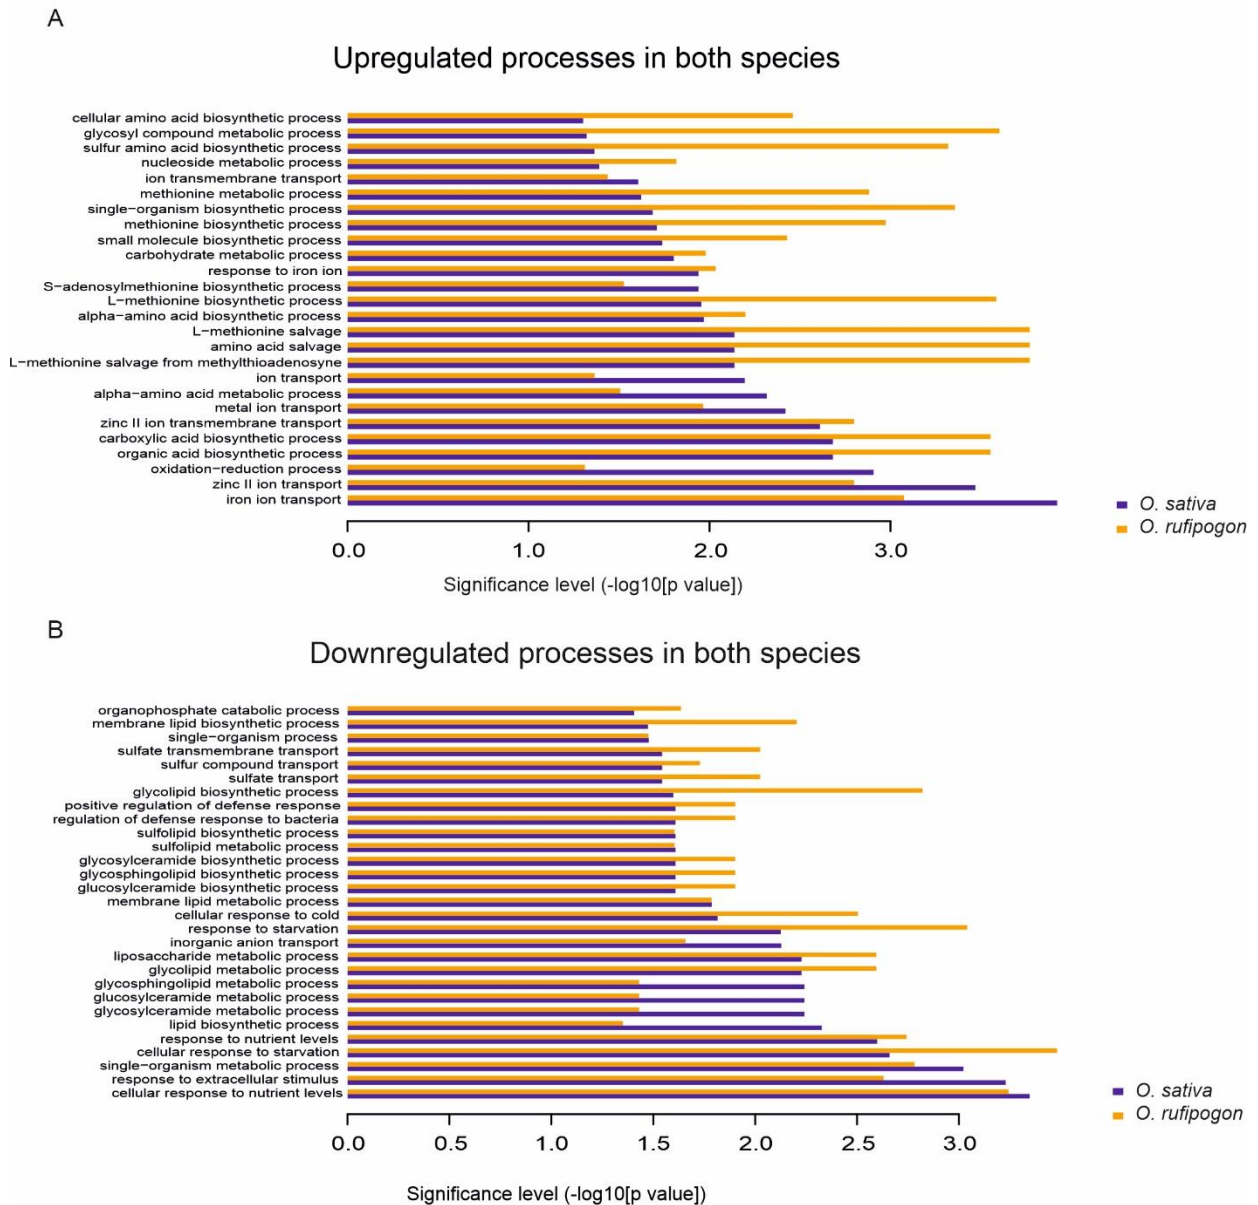

**Supplementary Figure 3.** Unique Gene Ontology (GO) terms in the response to Fe deficiency between cultivated (*Oryza sativa*) and wild (*Oryza rufipogon*) rice. Exclusive GO terms up and down-regulated by Fe deficiency in (A) *O. sativa* and (B) *O. rufipogon*. The figure presents the terms with high degree of significance for *O. sativa* and *O. rufipogon*. Blue bars represent terms up-regulated, and red bars represent terms down-regulated.

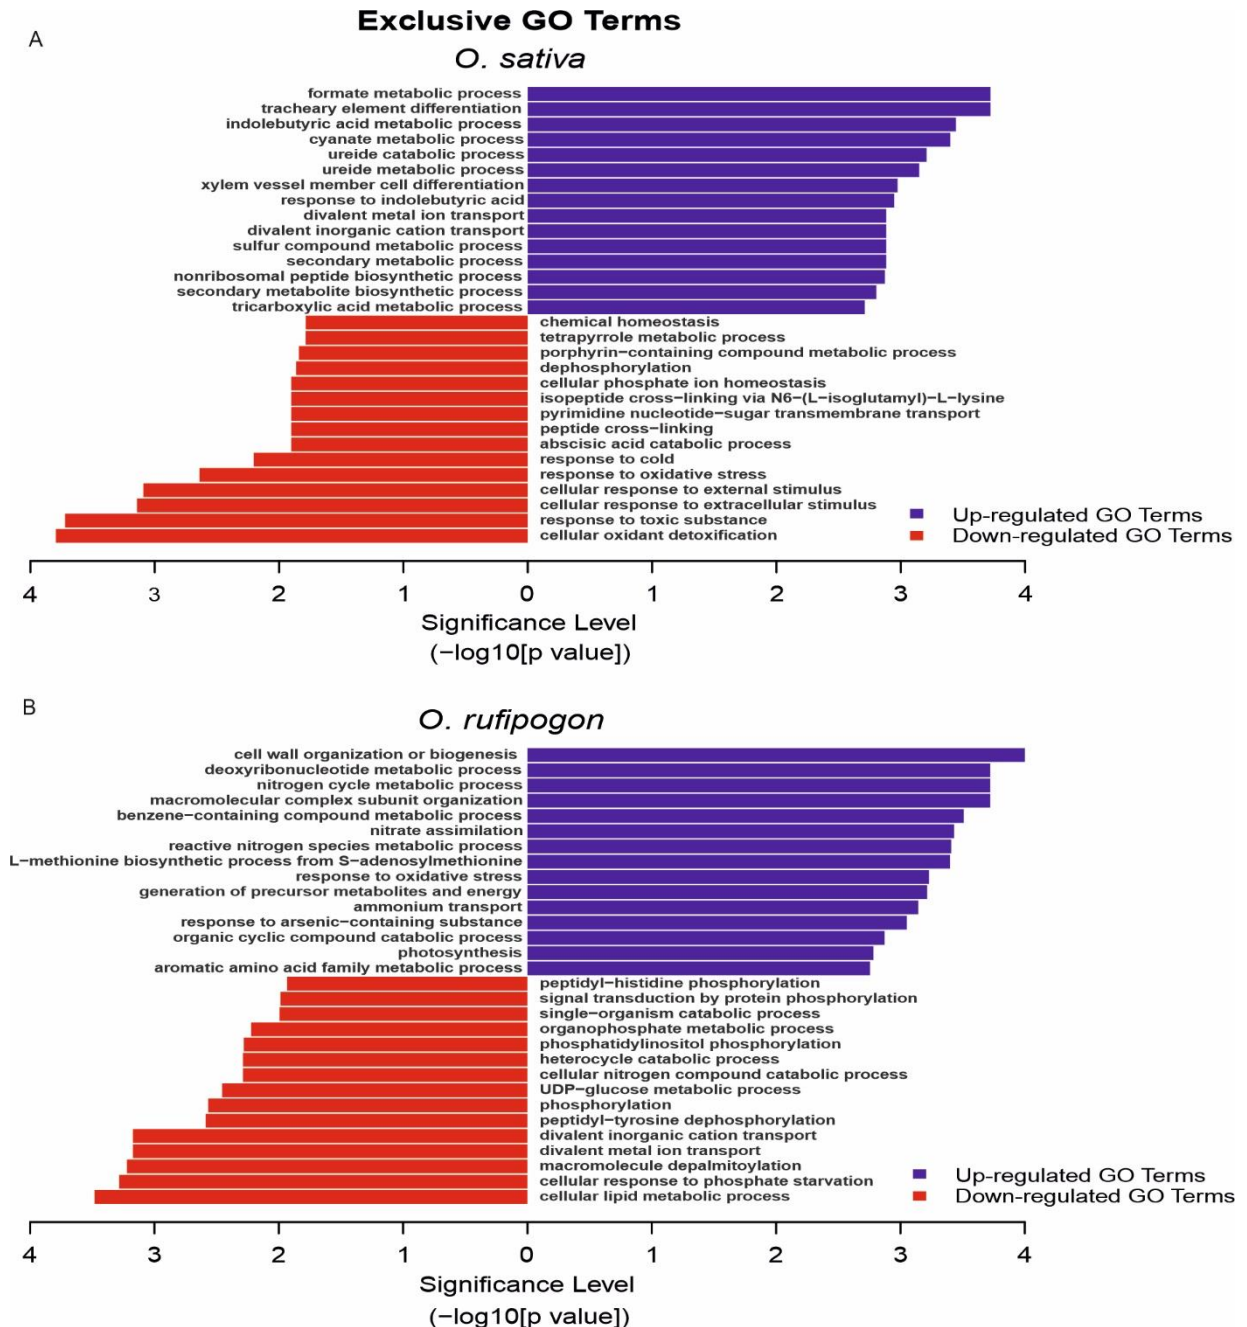

**Supplementary Figure 4.** Syntenic block search for the *OsIRT1* gene from *Oryza sativa*. A genomic block of *OsIRT1*, composed of 41 genes (20 genes up and 20 genes downstream of *OsIRT1*, plus *OsIRT1*), was employed to search the complete genomes of *Oryza meridionalis* (A) and *Oryza rufipogon* (B). In the *O. meridionalis* genome, no potential syntenic blocks were found (no peak occurs on the y-axis). When the *O. rufipogon* genome was considered as a positive control, potential syntenic blocks were found, indicated by a peak at the protein relative position 3000 (B).

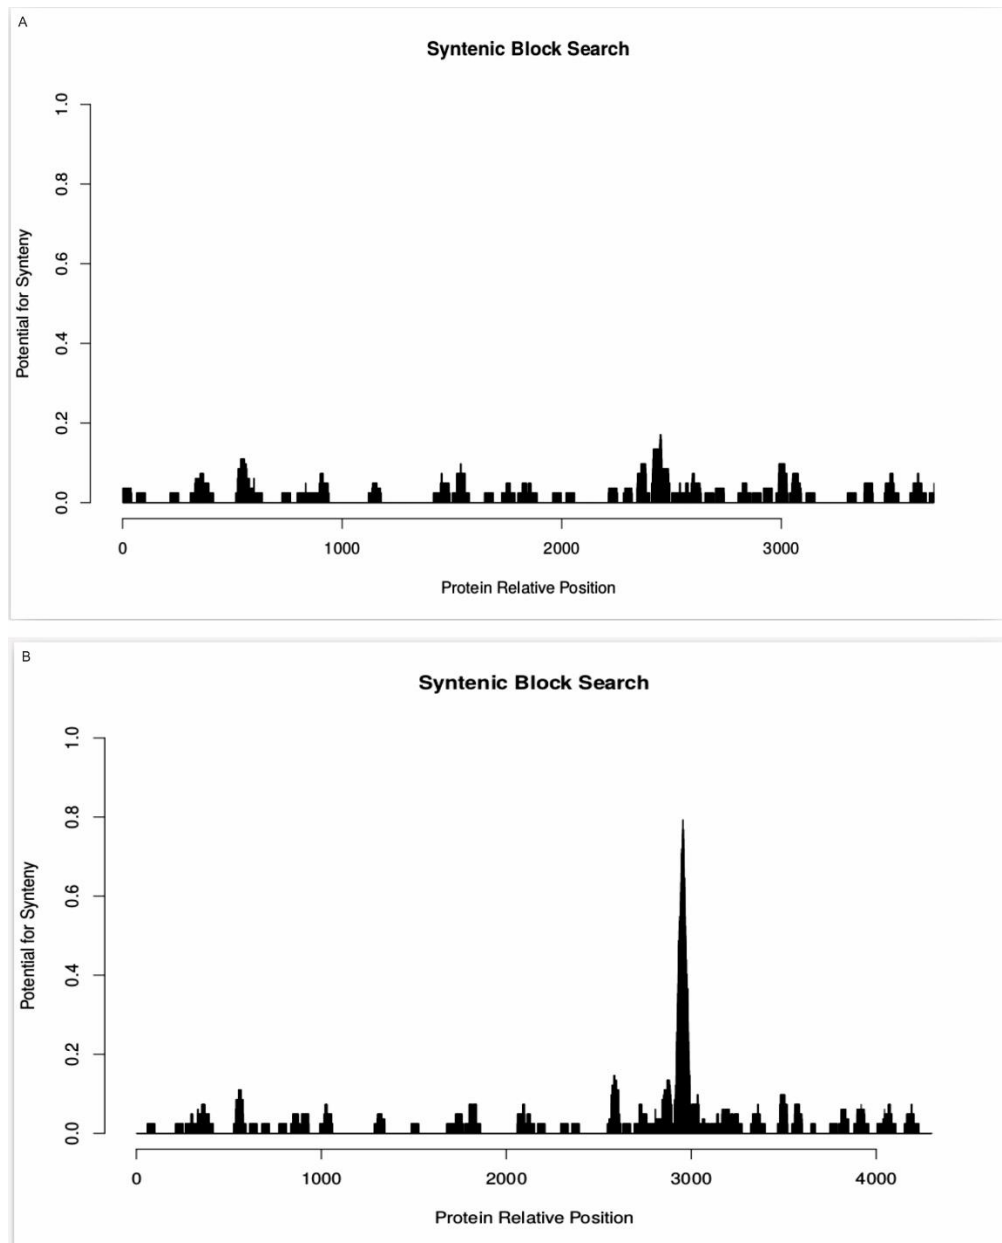

**Supplementary Figure 5.** Collinearity analyses of Fe deficiency-related genes in *Oryza* spp., maize, and sorghum. Graphs displaying the results from the collinearity analysis, performed through the MCSCanX tool, across the *Oryza* genus, *Zea mays*, and *Sorghum bicolor* gene orthologs. The analyses were performed on genomic segments containing 41 genes. Arrows present the orientation of genes. Numbers represent the genes inside the genomic segments. The target gene (*YSL15*, *IRO2*, *NRAMP1*, or *IRT1*) is represented by number 0. (A) Collinearity analysis for *IRT1*. (B) Collinearity analysis for *YSL15*. (C) Collinearity analysis for *IRO2*. (D) Collinearity analysis for *NRAMP1*.



# Genomic collinearity block

## A IRT1

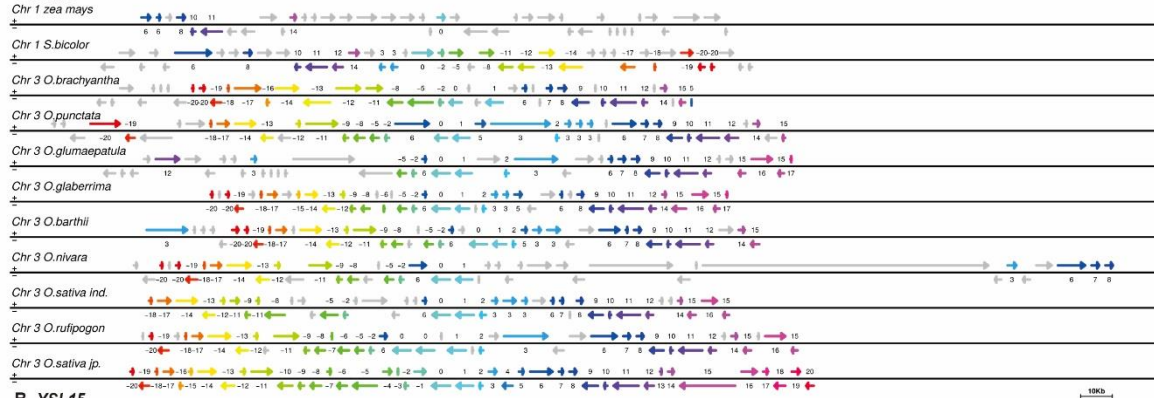

## B YSL15

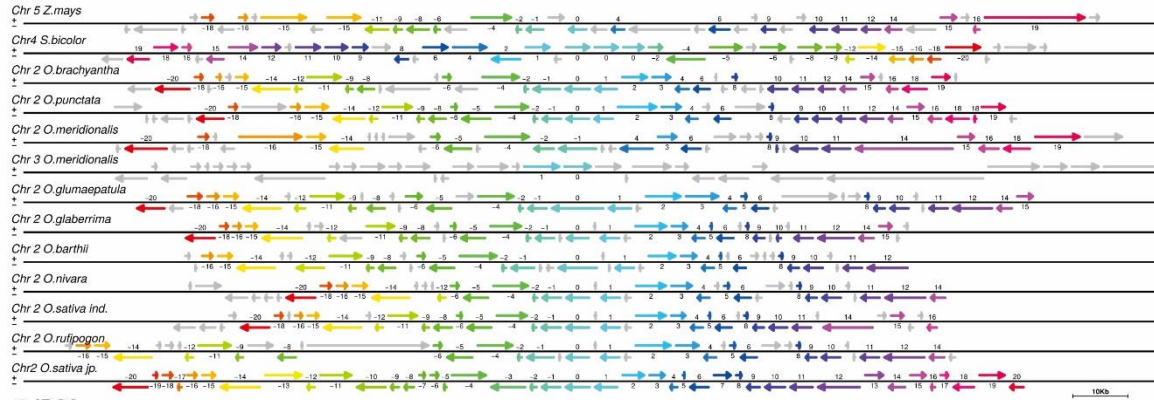

## C IRO2

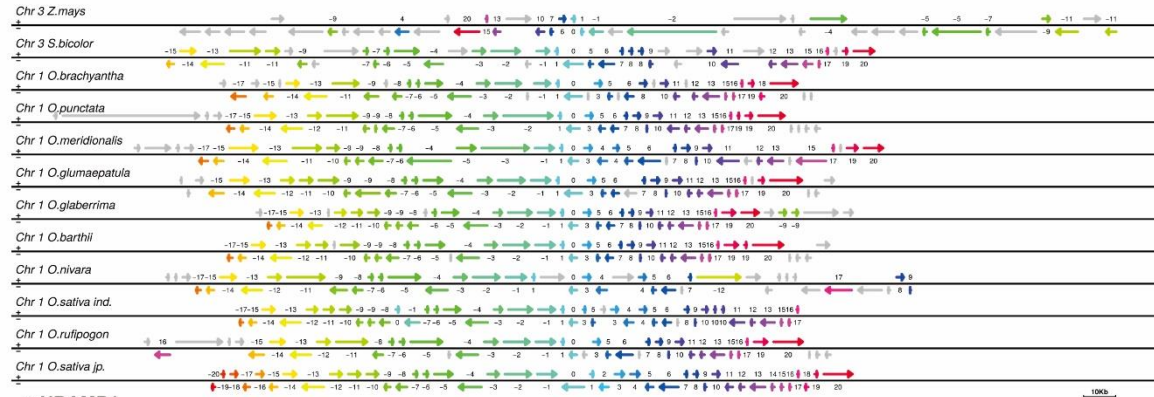

## D NRAMP1

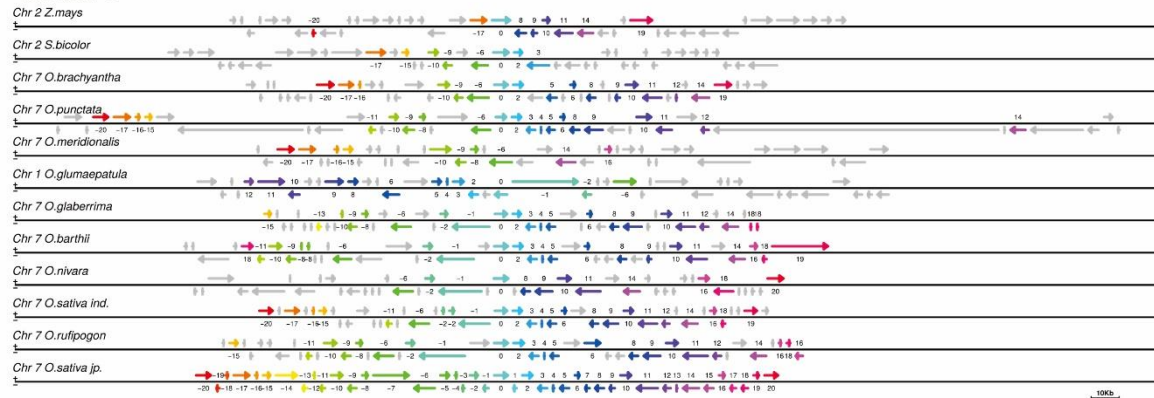

**Supplementary Figure 6.** Chlorophyll concentration in leaves of *Zea mays* plants grown under control (CC) or Fe deficiency (-Fe) conditions. Chlorophyll concentration ( $\mu\text{g}/\text{mg}$  DW). The  $x$ -axis represents days after the onset of -Fe treatment. Values are the averages of four samples  $\pm$  SE ( $n = 4$ , 3 plants each). Asterisks indicate statistical difference between plants grown under CC and -Fe conditions (Student  $t$ -test, \*\*P-value  $< 0.01$ ). DW = dry weight.

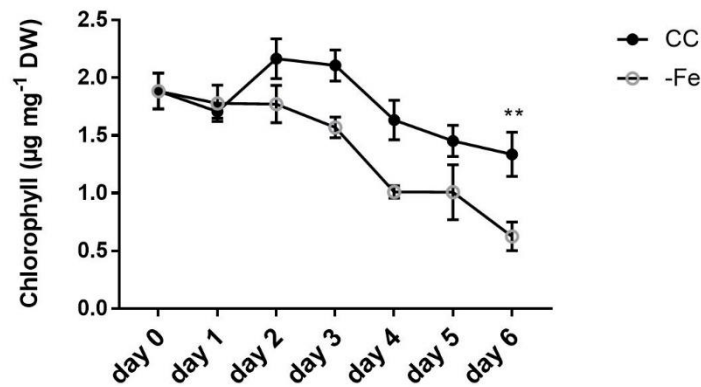

**Supplementary Figure 7.** Evaluation of Fe-deficiency symptoms when plants of *Sorghum bicolor* were grown under control (CC) or Fe deficiency (-Fe) conditions. (A) Chlorophyll concentration ( $\mu\text{g}/\text{mg}$  DW), ( $n = 4$ , 3 plants each). (B) Root dry weight (g) ( $n = 10$ ). (C) Shoot dry weight (g) ( $n = 10$ ). The  $x$ -axis represents days after the onset of -Fe treatment. Values are the averages of four or ten samples  $\pm$  SE. Asterisks indicate statistical difference between plants grown under CC and -Fe conditions (Student  $t$ -test, \*P-value  $< 0.05$ , \*\*P-value  $< 0.01$ , \*\*\*\*P-value  $< 0.0001$ ).

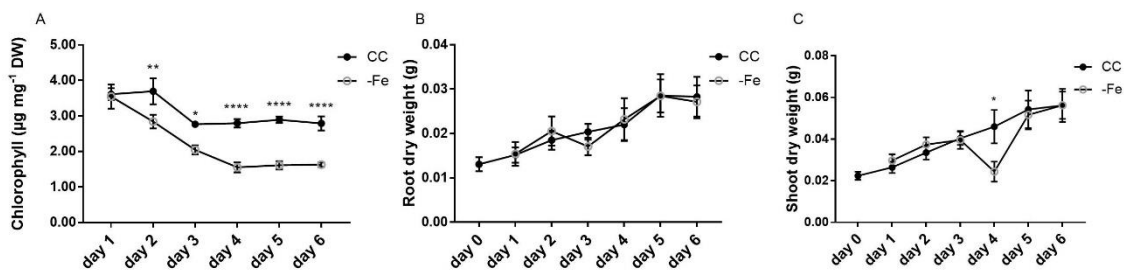

Supplement: 41598_2019_52502_MOESM1_ESM.pdf [file 41598_2019_52502_MOESM1_ESM.pdf]
